# Supplementary material for: Hypothetical interventions on emergency ambulance and prehospital acetylsalicylic acid administration in myocardial infarction patients presenting without chest pain
Source: Springer Nature journal article supplement (doi:10.1186/s12872-022-03000-1), 2022-12-22
Supplement: MOESM1 [file 23852826]

## Supplementary material

**Table S1** ICD-10 codes for comorbidities registered prior to MI diagnosis and for diagnoses registered during MI admission.

| <b>Disease</b>                            | <b>ICD-10 codes</b>                                                                              |
|-------------------------------------------|--------------------------------------------------------------------------------------------------|
| <b>Myocardial infarction</b>              | I21                                                                                              |
| <b>Ischemic heart disease</b>             | I20, I22-25                                                                                      |
| <b>Congestive heart failure</b>           | I11.0, I13.0, I13.2, I42.0, I42.6, I42.7, I42.8, I42.9, I50.0, I50.1, I50.2, I50.3, I50.8, I50.9 |
| <b>Moderate/severe renal disease</b>      | I12, I13, N00-N05, N07, N11, N14, N17-N19, Q61                                                   |
| <b>Chronic obstructive lung disease</b>   | J44                                                                                              |
| <b>Cancer (excluding malign melanoma)</b> | C00-C42 and C44-C97                                                                              |
| <b>Arterial fibrillation</b>              | I48                                                                                              |
| <b>Cardiac arrest</b>                     | I46                                                                                              |
| <b>Cardiogenic shock</b>                  | R570                                                                                             |

Comorbidities were defined as registrations of a primary or secondary diagnosis in the Danish National Patient Registry up to 5 years prior to the call. For diagnosis registered during the MI admission for which the patient was included in the study, we included all types of diagnosis. ICD-10: International Classification of Diseases, 10th revision.

**Table S2** ATC-codes for claimed prescribed medication used to define presence of disease and use of medication

| <b>Disease/medicine</b> | <b>ATC codes</b>                                                                                                                                                                                                                                                                                                                                                                                 |
|-------------------------|--------------------------------------------------------------------------------------------------------------------------------------------------------------------------------------------------------------------------------------------------------------------------------------------------------------------------------------------------------------------------------------------------|
| <b>Type 2 diabetes</b>  | A10                                                                                                                                                                                                                                                                                                                                                                                              |
| <b>Hypertension</b>     | $\alpha$ adrenergic blockers: C02A, C02B, C02C<br>Diuretics: C02DA, C03A, C03B, C03D, C03E, C03X, C02DA, C07B, C07C, C07D, C08G, C09BA, C09DA, C09XA52, C02L<br>Vasodilators: C02DB, C02DD, C02DG,<br>Beta-blockers: C07A-D, C07F<br>Calcium channel blockers: C07FB, C08, C08G, C09BB, C09DB<br>Renin-angiotensin system inhibitors: C09AA, C09BA, C09BB, C09CA, C09DA, C09DB, C09XA02, C09XA52 |
| <b>NSAID</b>            | M01A                                                                                                                                                                                                                                                                                                                                                                                             |
| <b>Opioids</b>          | N02AA01, N02AA03-5, N02AA55, N02AB02, N02AB03, N02AE01, N02AG02, N02AX02, N02AX06, N07BC02, R05DA04                                                                                                                                                                                                                                                                                              |

**Table S3** ICD-10 codes for MI diagnoses

| MI diagnosis  | ICD-10 codes            |
|---------------|-------------------------|
| STEMI         | I210B, I211B, I213      |
| NSTEMI        | I210A, I211A, I214      |
| Unknown/other | I210, I211, I219, I219A |

ICD-10: International Classification of Diseases, 10th revision.

**Table S4** Subset of diagnosis registered during admission with MI (for which the patient was included in this study).

| Diagnosis registred during admission with MI | Non-chest pain |            | Chest pain |            |
|----------------------------------------------|----------------|------------|------------|------------|
|                                              | N              | Proportion | N          | Proportion |
| MI                                           | 1309           | 100%       | 4109       | 100%       |
| Ischemic heart disease                       | 386            | 29.49%     | 1329       | 32.34%     |
| Heart failure                                | 282            | 21.54%     | 422        | 10.27%     |
| Atrial fibrillation                          | 138            | 10.54%     | 288        | 7.01%      |
| COPD                                         | 126            | 9.63%      | 91         | 2.21%      |
| Moderate/severe renal disease                | 68             | 5.19%      | 97         | 2.36%      |
| Cardiac arrest                               | 31             | 2.37%      | 46         | 1.12%      |
| Cardiogenic shock                            | 28             | 2.14%      | 25         | 0.61%      |

N is the number of admissions where the diagnosis was registered for non-chest pain and chest pain, respectively. The proportion indicates the share of all admissions for non-chest pain/chest pain where the diagnosis was registered. We included all types of diagnoses including primary, secondary, and referral diagnoses.

**Table S5** Minutes from call to hospital arrival for subgroups of chest pain and non-chest pain and emergency response.

| Population     | Response               | N    | Time from call to hospital arrival in minutes |                      |                 |                 |              |
|----------------|------------------------|------|-----------------------------------------------|----------------------|-----------------|-----------------|--------------|
|                |                        |      | Mean                                          | Median IQR [25%;75%] | 10th percentile | 90th percentile | Missing data |
| Non-chest pain | Emergency ambulance    | 527  | 57.6                                          | 51.5 [41.1;63.5]     | 34.1            | 78.5            | 4            |
|                | No emergency ambulance | 782  | 124.0                                         | 61.6 [44.2;92.7]     | 27.2            | 199.5           | 4            |
| Chest pain     | Emergency ambulance    | 3731 | 49.3                                          | 46.4 [37.2;56.6]     | 30.6            | 69.9            | 14           |
|                | No emergency ambulance | 378  | 92.7                                          | 49.7 [29.9;68.8]     | 16.4            | 99.4            | ≤ 3          |
